# Supplementary material for: Prognostic significance of BRAF and NRAS mutations in melanoma: a German study from routine care
Source: Springer Nature journal article supplement (doi:10.1186/s12885-017-3529-5), 2017-08-10
Supplement: 12885_2017_3529_MOESM2_ESM.pdf [file 12885_2017_3529_MOESM2_ESM.pdf]

# Overall survival

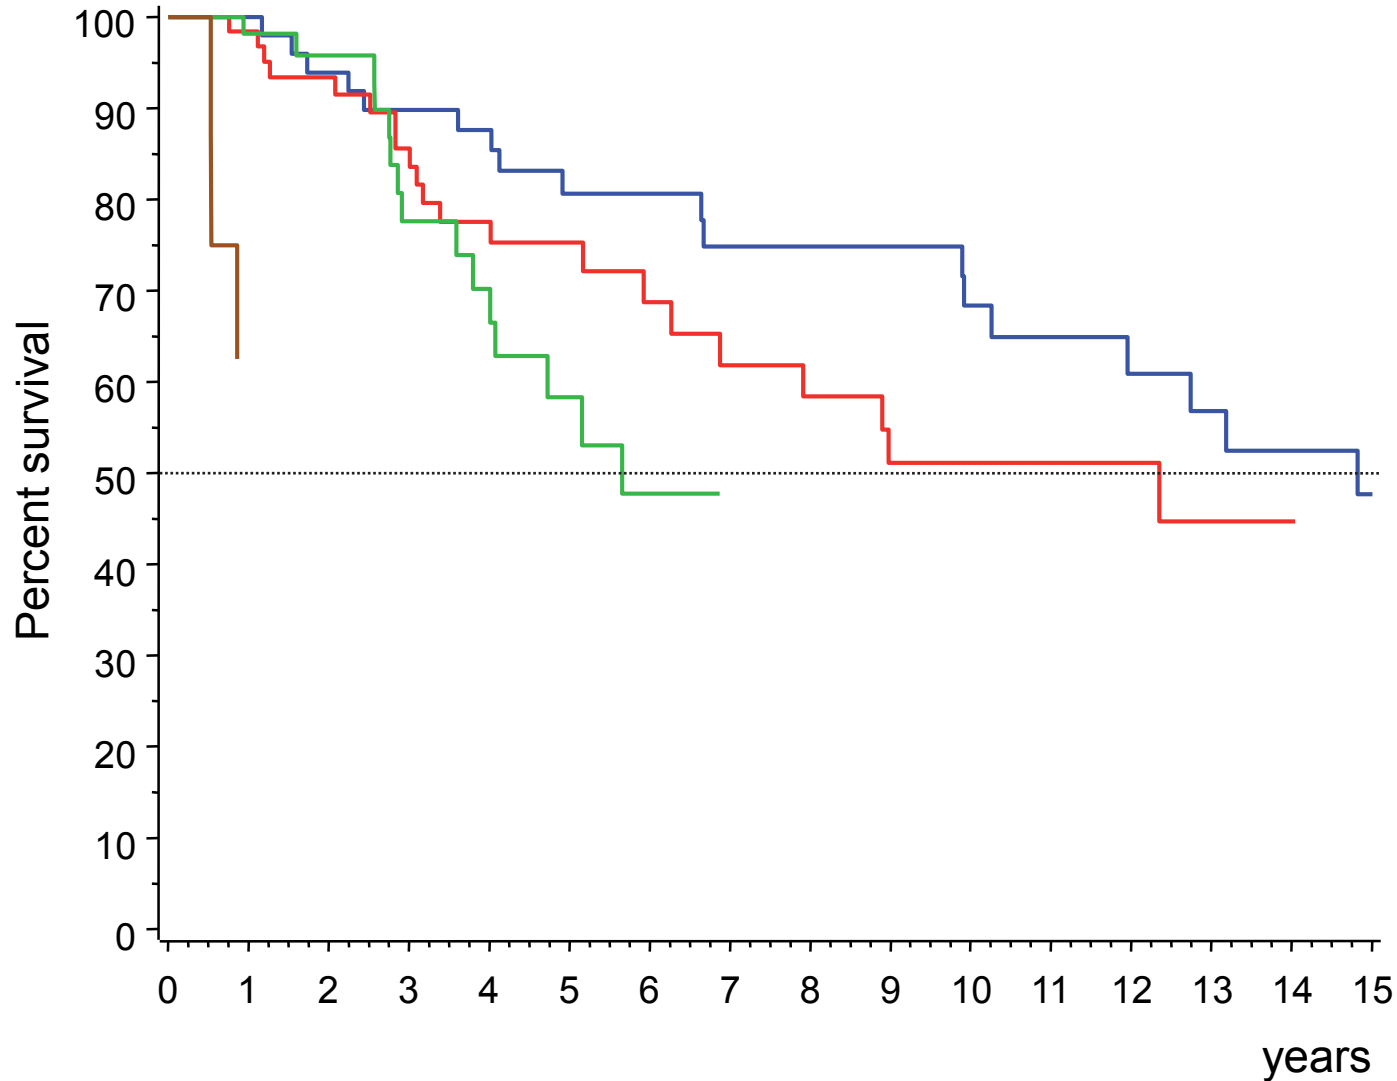

| AJCC stage |            |
|------------|------------|
| I          | n=55 28.8% |
| II         | n=65 34.0% |
| III        | n=63 33.0% |
| IV         | n=8 4.2%   |

p=0.0045
