# Supplementary material for: Prognostic significance of BRAF and NRAS mutations in melanoma: a German study from routine care
Source: Springer Nature journal article supplement (doi:10.1186/s12885-017-3529-5), 2017-08-10
Supplement: MOESM3 [file 13942206]

Time to loco-regional relapse

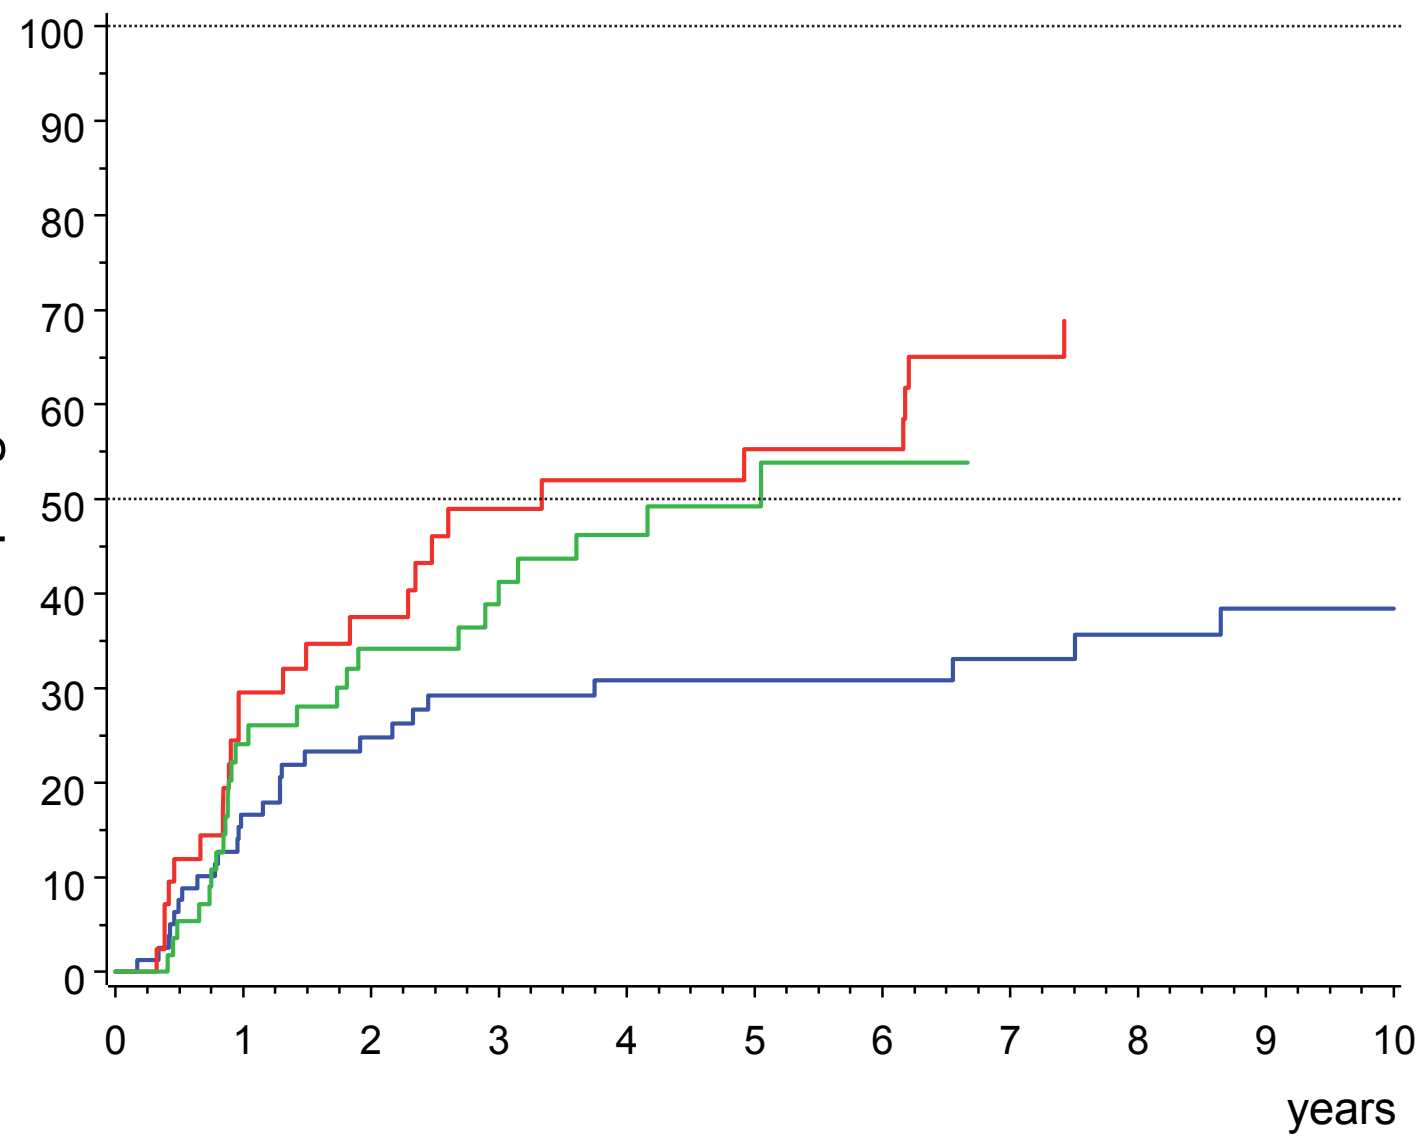

| Genotype |       |
|----------|-------|
| BRAF     | 44.1% |
| n=79     |       |
| NRAS     | 23.5% |
| n=42     |       |
| WT       | 32.4% |
| n=58     |       |

p=0.0028

Time to distant metastasis

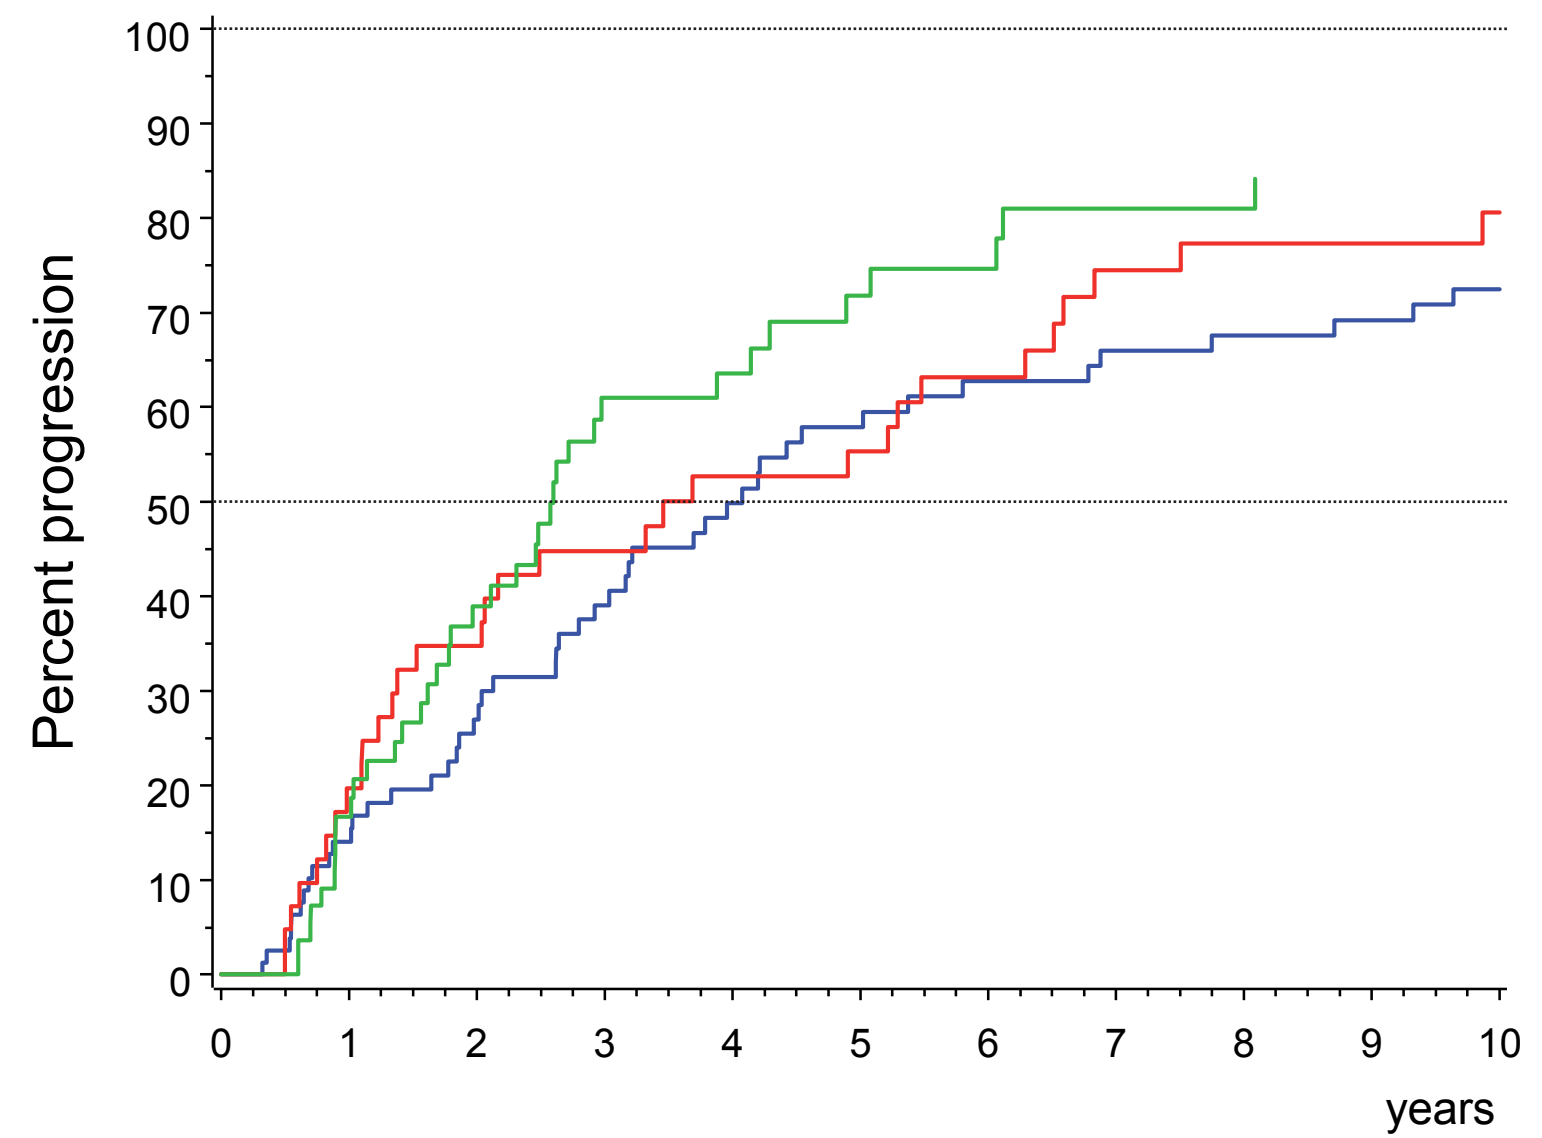

| Genotype |       |
|----------|-------|
| BRAF     | 44.1% |
| n=79     |       |
| NRAS     | 23.5% |
| n=42     |       |
| WT       | 32.4% |
| n=58     |       |

p=0.1170

Overall survival

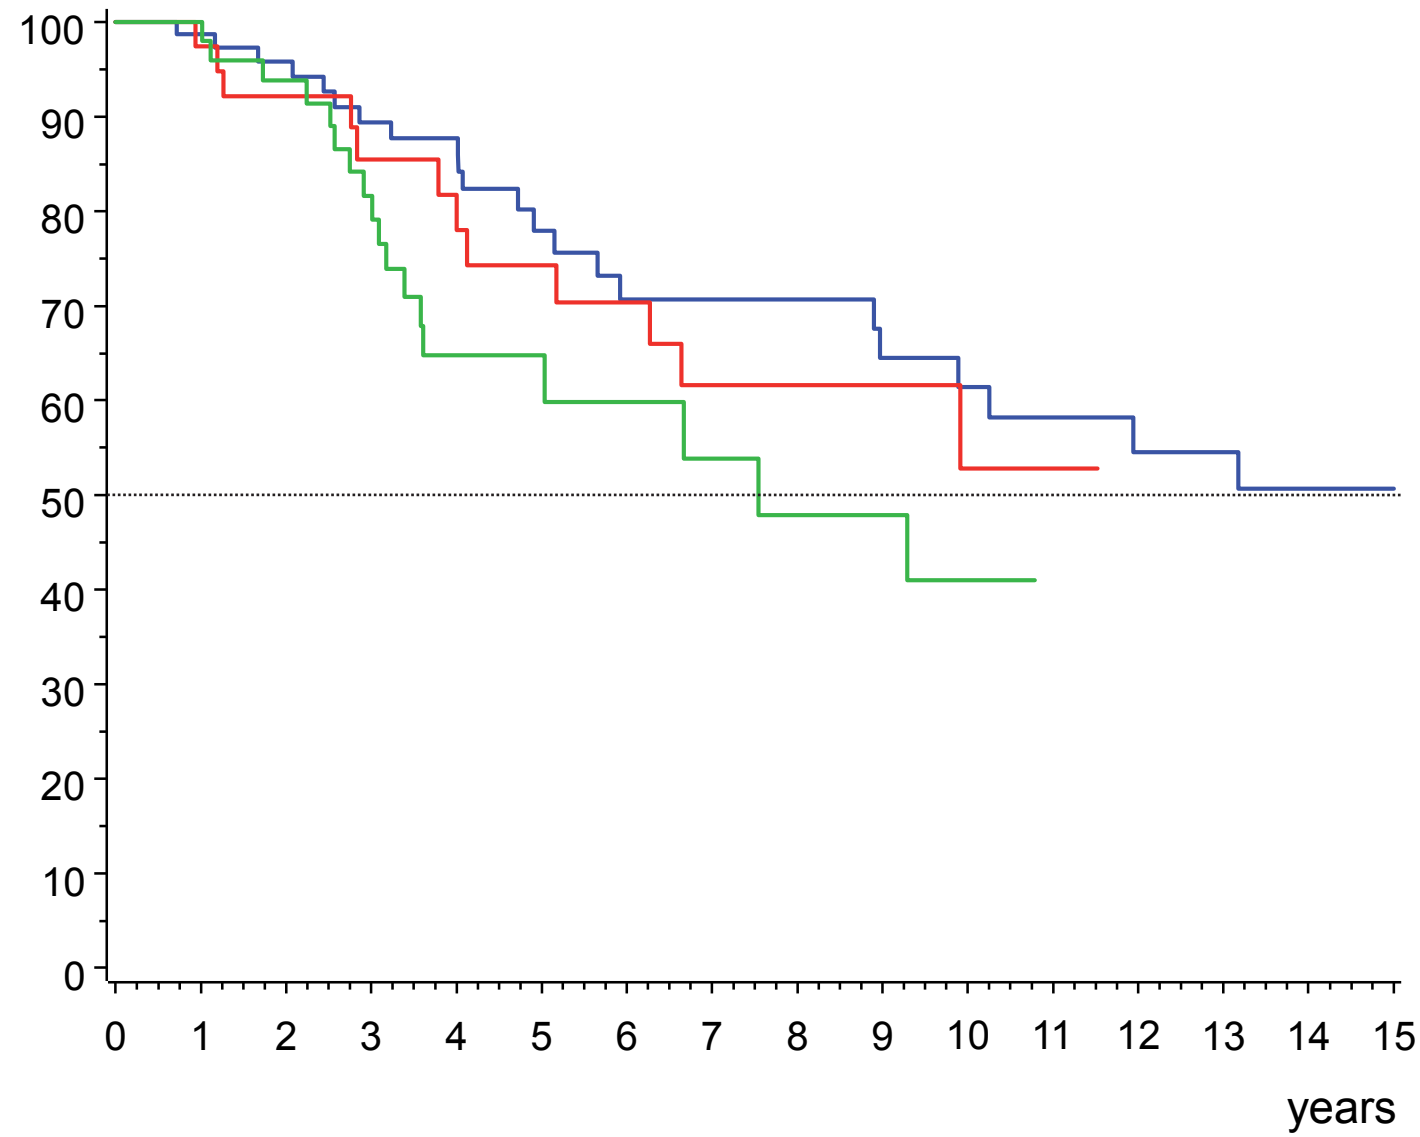

| Genotype |       |
|----------|-------|
| BRAF     | 44.1% |
| n=79     |       |
| NRAS     | 23.5% |
| n=42     |       |
| WT       | 32.4% |
| n=58     |       |

p=0.1161

Relative survival

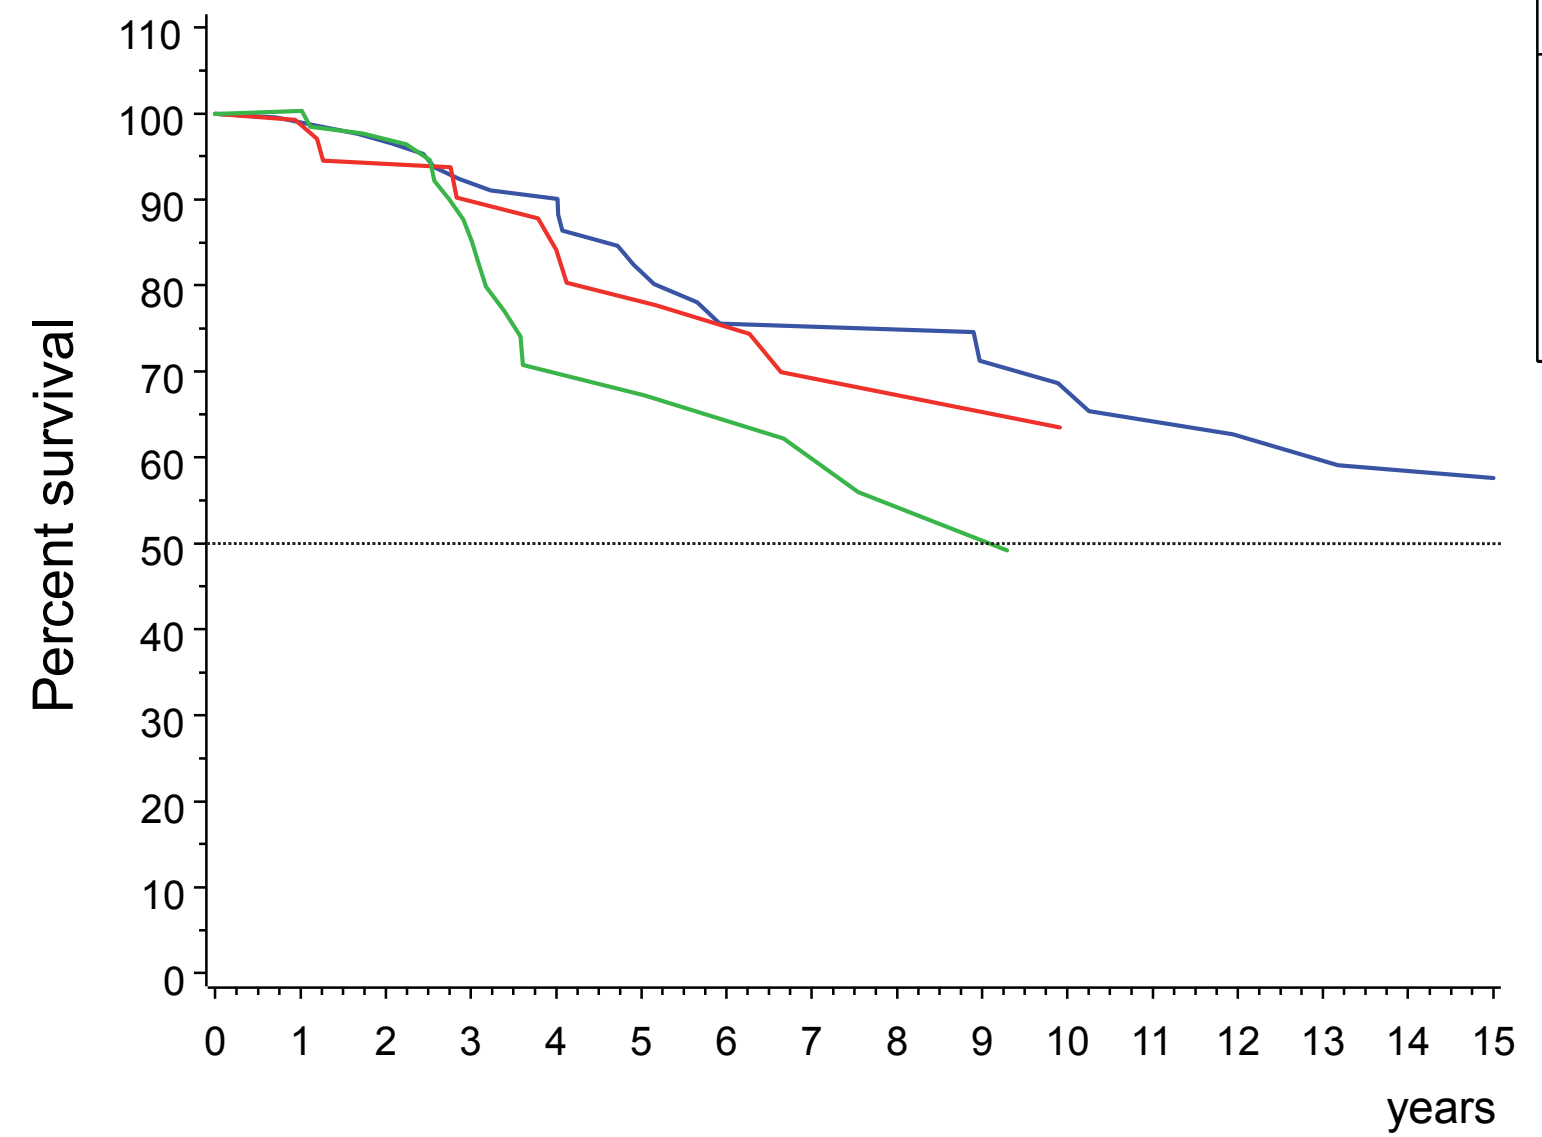

| Genotype |       |
|----------|-------|
| BRAF     | 44.1% |
| n=79     |       |
| NRAS     | 23.5% |
| n=42     |       |
| WT       | 32.4% |
| n=58     |       |
